# Supplementary material for: A versatile Tb(iii) complex for picosecond filamentation, a transparent thin film and a supramolecular gel
Source: Royal Society of Chemistry journal article supplement (doi:10.1039/c1pp05234a), 2011-08-31
Supplement: c1pp05234a.pdf [file c1pp05234a.pdf]

## Electronic Supplementary Information

### **A versatile Tb(III) complex for picosecond filamentation, transparent thin film, and supramolecular gel**

Yi-Min Zhu,<sup>a</sup> Ming-Yuan Xie,<sup>b</sup> Rui Zhang,<sup>b</sup> Yang-Yi Yang,<sup>\*a</sup> Cheng-Hui Zeng,<sup>a</sup>  
Fu-Li Zhao,<sup>\*b</sup> Ye-Xiang Tong,<sup>a</sup> Cheng-Yong Su<sup>a</sup> and Wing-Tak Wong<sup>c</sup>

<sup>a</sup> MOE Key Laboratory of Bioinorganic and Synthetic Chemistry, KLGHEI of Environment and Energy Chemistry, School of Chemistry and Chemical Engineering, Sun Yat-Sen University, Guangzhou, 510275, P. R. China. E-mail: [cesyyy@mail.sysu.edu.cn](mailto:cesyyy@mail.sysu.edu.cn)

<sup>b</sup> School of Physics and Engineering, Sun Yat-Sen University, Guangzhou, 510275, P. R. China. E-mail: [stszfl@mail.sysu.edu.cn](mailto:stszfl@mail.sysu.edu.cn)

<sup>c</sup> Department of Applied Biology and Chemical Technology, The Hong Kong Polytechnic University, P. R. China.

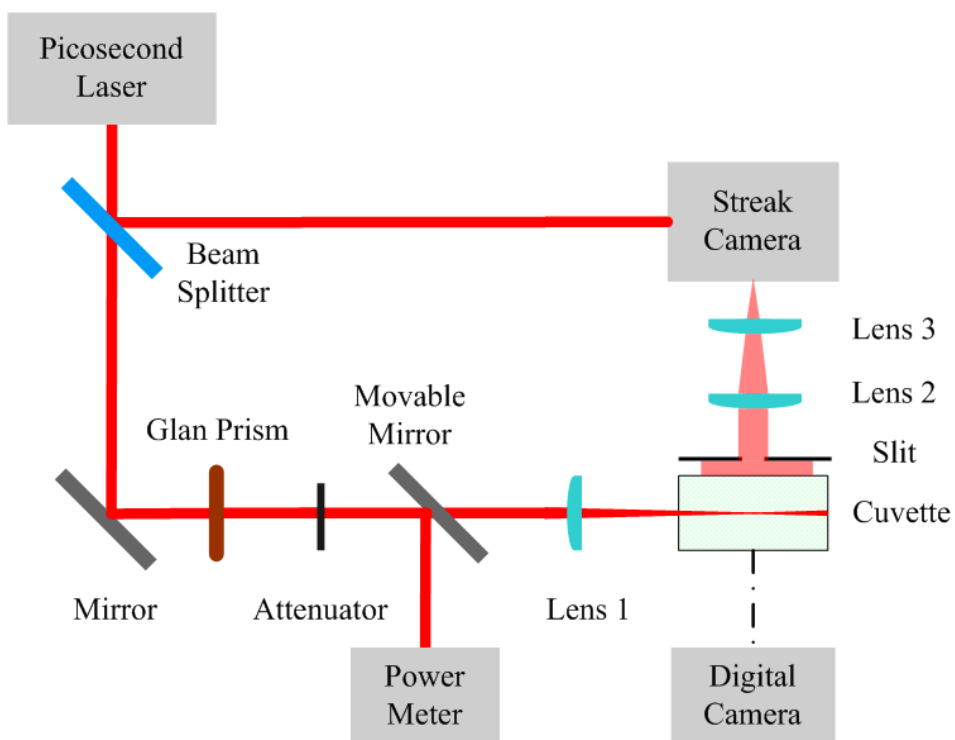

**Scheme S1** Diagram of the TPA experiment setup.

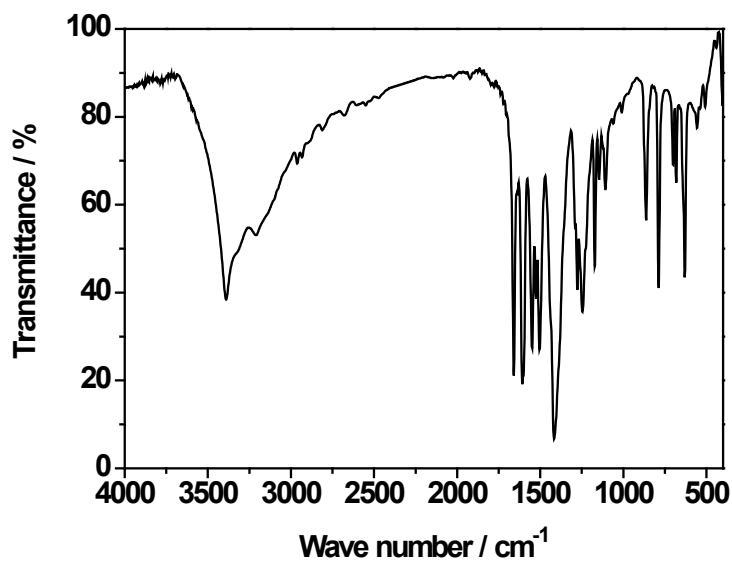

**Fig. S1** IR spectrum of 1 in powder.

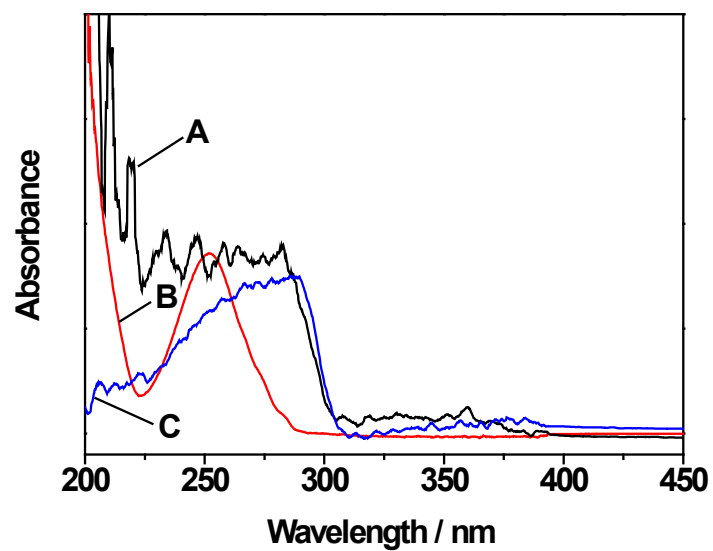

**Fig. S2** UV-vis absorption spectra of **1** in thin film (A),  $5 \times 10^{-6}$  M methanol solution (B), and powder (C).
